# Supplementary material
Source: HighWire-hosted journal article supplement (https://jnm.snmjournals.org/highwire/filestream/95080/field_highwire_adjunct_files/0/178970_Supplemental_Data.pdf)
Supplement: 178970_Supplemental_Data.pdf [file 178970_Supplemental_Data.pdf]

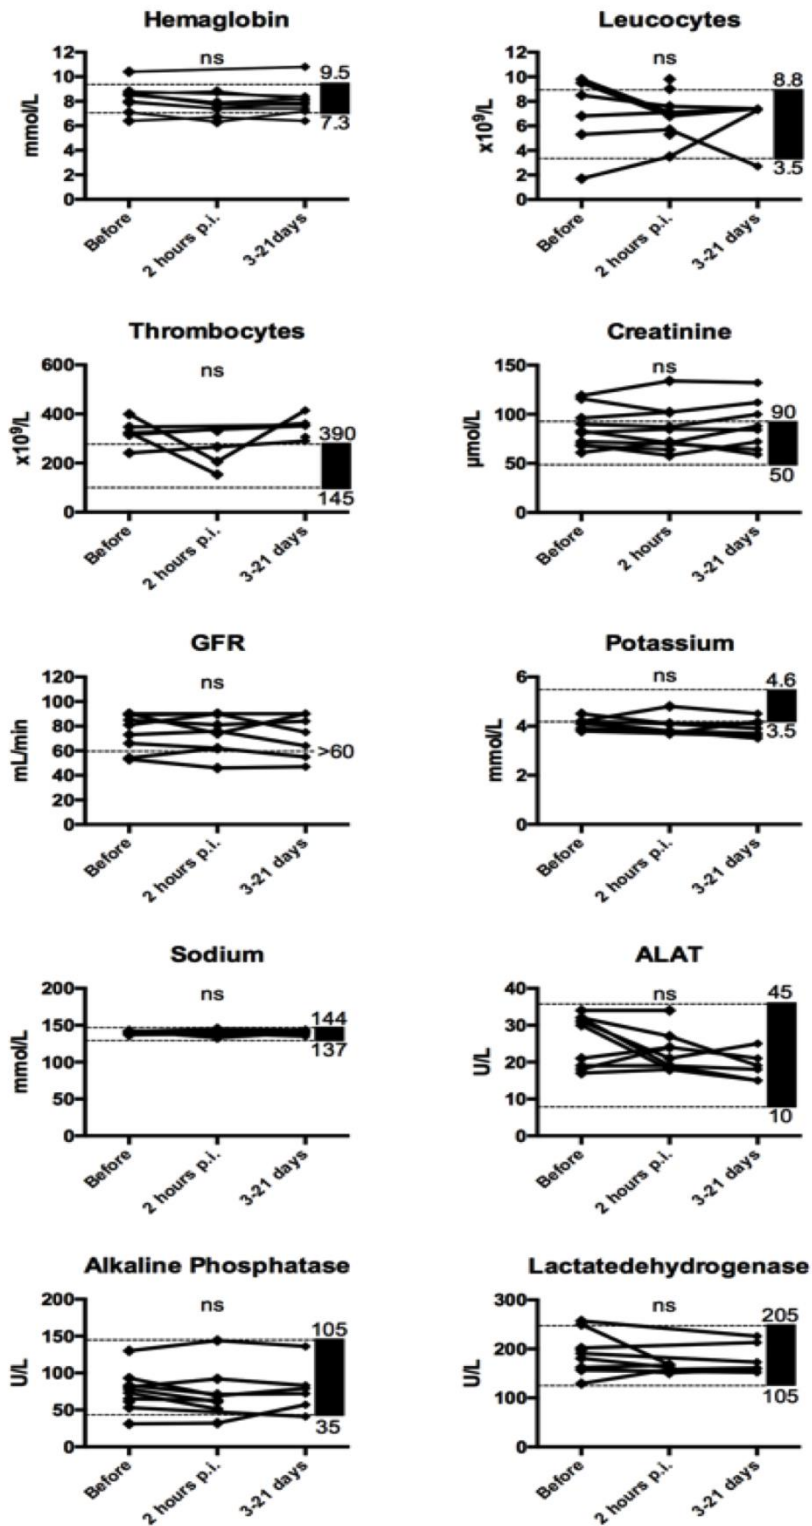

Supplemental Figure 1. Specifications and results of the  $^{68}\text{Ga}$ -NOTA-AE105 preparations.

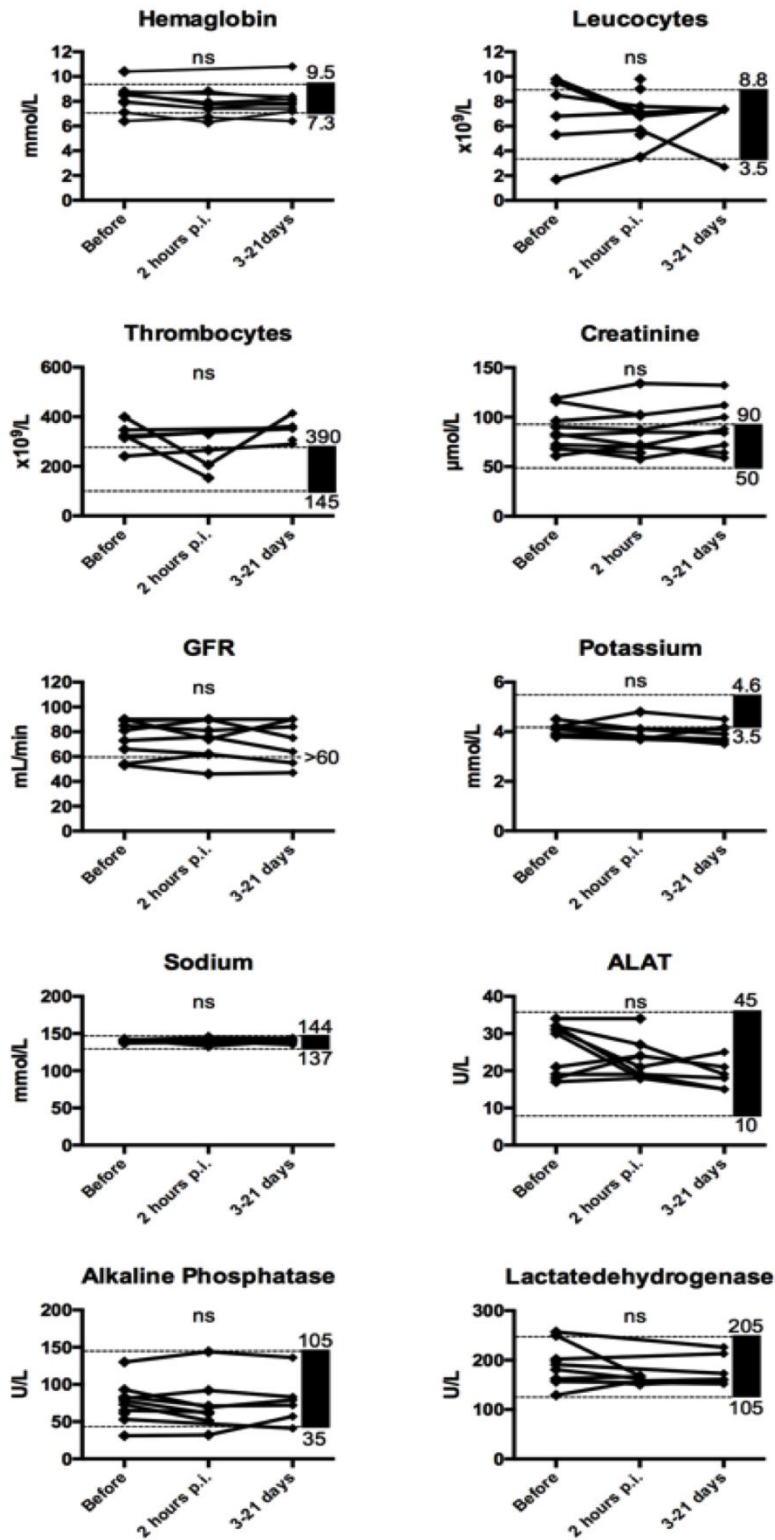

Supplemental Figure 2. Blood pressure and heart rate following injection of  $^{68}\text{Ga}$ -NOTA-AE105

Supplemental Table 1

| Analysis                                                             | Specification                                         | Results (n=10)                                                            |
|----------------------------------------------------------------------|-------------------------------------------------------|---------------------------------------------------------------------------|
| Appearance                                                           | Clear and colorless                                   | Clear and colorless                                                       |
| Radioactivity                                                        | 100 – 500 MBq                                         | 423 MBq $\pm$ 37 MBq                                                      |
| Radiochemical purity<br><sup>68</sup> Ga-NOTA-AE105 (HPLC)           | $\geq$ 91% (combined)                                 | 97.0 % $\pm$ 1.3 %                                                        |
| <sup>68</sup> Ga <sup>3+</sup> and <sup>68</sup> Ga-colloid<br>(TLC) | $\geq$ 91%<br>$\leq$ 2 %                              | 97.2 % $\pm$ 1.2 %<br>0.18 % $\pm$ 0.18 %                                 |
| Chemical purity<br>Ethanol<br>Acetone<br>Metal-NOTA-<br>AE105        | $\leq$ 8 %<br>< 5000 ppm<br>Max. injected dose: 40 ug | 6.4 % $\pm$ 1.1 %<br>14 ppm $\pm$ 8 ppm<br>33.2 $\mu$ g $\pm$ 7.6 $\mu$ g |
| pH                                                                   | 4.0 – 8.0                                             | 7.1 $\pm$ 0.9                                                             |
| LAL-test                                                             | 0.125 IU/ml                                           | All < 0.125 IU/ml                                                         |
| Sterility test                                                       | Sterile                                               | All sterile*                                                              |
| Shelf-life                                                           | 2 hours                                               | 2 hours                                                                   |

The specifications for radiochemical purity and ethanol are similar to the specifications in the <sup>68</sup>Ga-DOTATOC monograph. The specification for acetone is based on the limits defined in "ICH guideline Q3C (R5) on impurities: guideline for residual solvents".

A dose of 40  $\mu$ g is considered safe based on our toxicology studies.

Pyrogen testing was performed on all productions for patient studies. The results were obtained post release.

\*The sterility of 3 validation batches was tested. The results were obtained before the study was initiated.

**Supplemental Table 1. Blood biochemistry parameters in each patient.** Individual plots of hemoglobin, leucocytes, thrombocytes, creatinine, estimated glomerular filtration rate (eGFR), potassium, sodium, alanine aminotransferase (ALAT), alkaline phosphatase and lactate-dehydrogenase before injection of <sup>68</sup>Ga-NOTA-AE105, immediately after and on return to the hospital 3-21 days following the study day. No significant differences in any parameter were found. Black bars in the right side of the figure with top-bottom values indicate reference interval.

| <b>Blood pressure and Pulse during the PET/CT scans</b> |               |           |       |                             |           |       |                              |           |       |                              |           |       |                               |           |       |
|---------------------------------------------------------|---------------|-----------|-------|-----------------------------|-----------|-------|------------------------------|-----------|-------|------------------------------|-----------|-------|-------------------------------|-----------|-------|
| <b>Time</b>                                             | <b>Before</b> |           |       | <b>1 min post injection</b> |           |       | <b>10 min post injection</b> |           |       | <b>1 hour post injection</b> |           |       | <b>2 hours post injection</b> |           |       |
| <b>Patient #</b>                                        | Systolic      | Diastolic | Pulse | Systolic                    | Diastolic | Pulse | Systolic                     | Diastolic | Pulse | Systolic                     | Diastolic | Pulse | Systolic                      | Diastolic | Pulse |
| 1                                                       | 121           | 70        | 69    | 105                         | 71        | 60    | 103                          | 67        | 77    | 117                          | 75        | 64    | 118                           | 66        | 72    |
| 2                                                       | 159           | 98        | 98    | 158                         | 104       | 93    | 171                          | 99        | 89    | 161                          | 96        | 88    | 155                           | 93        | 90    |
| 3                                                       | 147           | 71        | 58    | 143                         | 66        | 57    | 146                          | 71        | 57    | 169                          | 72        | 61    | 177                           | 74        | 67    |
| 4                                                       | 138           | 83        | 68    | 153                         | 100       | 73    | 150                          | 101       | 69    | 137                          | 88        | 71    | 150                           | 92        | 73    |
| 5                                                       | 119           | 73        | 64    | 125                         | 74        | 69    | 101                          | 63        | 69    | 113                          | 66        | 68    | 110                           | 73        | 68    |
| 6                                                       | 134           | 74        | 69    | 104                         | 61        | 65    | 103                          | 54        | 69    | 125                          | 76        | 89    | 128                           | 75        | 73    |
| 7                                                       | 127           | 73        | 80    | 120                         | 69        | 79    | 120                          | 82        | 82    | 144                          | 79        | 83    | 137                           | 80        | 92    |
| 8                                                       | 124           | 75        | 75    | 114                         | 75        | 75    | 121                          | 74        | 72    | 130                          | 81        | 69    | 128                           | 83        | 68    |
| 9                                                       | 150           | 103       | 80    | 144                         | 93        | 76    | 141                          | 91        | 78    | 146                          | 97        | 74    | 138                           | 88        | 80    |
| 10                                                      | 177           | 93        | 68    | 169                         | 96        | 68    | 147                          | 91        | 61    | 155                          | 97        | 64    | 146                           | 81        | 61    |

**Supplemental Table 2. Metabolic analysis of <sup>68</sup>Ga-NOTA-AE105 in plasma.** Relative time-dependent activity concentrations in plasma (n=6). Plasma half life was estimated to 8.5 min.
